# Supplementary material
Source: MDPI journal article supplement (https://www.mdpi.com/2225-1154/9/12/172)
Supplement: s1 [file s1]

## Supplementary Materials:

**Table S1.** Summary of systematic literature review results.

| Source                                            | Total # items | # papers with keywords | # papers after initial screening |
|---------------------------------------------------|---------------|------------------------|----------------------------------|
| Web of Science                                    | >78,000,000   | 130                    | 25                               |
| Vertebrate Pest Conference 2020                   | 68            | 3                      | 0                                |
| Vertebrate Pest Conference 2018                   | 63            | 0                      | 0                                |
| Vertebrate Pest Conference 2016                   | 75            | 0                      | 0                                |
| Vertebrate Pest Conference 2014                   | 90            | 3                      | 0                                |
| Vertebrate Pest Conference 2012                   | 71            | 2                      | 0                                |
| Australasian Vertebrate Pest Conference 2017      | 140           | 1                      | 0                                |
| Australasian Vertebrate Pest Conference 2014      | 135           | 5                      | 1                                |
| Australasian Vertebrate Pest Conference 2011      | 187           | 6                      | 0                                |
| International Conference on Island Invasives 2017 | 178           | 10                     | 7                                |
| International Conference on Island Invasives 2011 | 140           | 3                      | 0                                |

**Table S2.** Summary of studies from systematic literature review that passed the secondary screening.

| Database       | Source type           | Paper type          | Source | Eradication as a climate solution? | Specific link between eradication and climate solution                                                                                              |
|----------------|-----------------------|---------------------|--------|------------------------------------|-----------------------------------------------------------------------------------------------------------------------------------------------------|
| Web of Science | peer-reviewed article | review              | [1]    | Yes                                | Potential for eradications to contribute to sustainable development goals, including ones related to climate resilience, mitigation, and adaptation |
| Web of Science | peer-reviewed article | empirical/modelling | [2]    | Potential                          | Removing rabbits may reduce erosion, especially because erosion and landslides                                                                      |

| Database       | Source type           | Paper type          | Source | Eradication as a climate solution? | Specific link between eradication and climate solution                                                                                                                              |
|----------------|-----------------------|---------------------|--------|------------------------------------|-------------------------------------------------------------------------------------------------------------------------------------------------------------------------------------|
|                |                       |                     |        |                                    | becoming more frequent with increasing rainfall                                                                                                                                     |
| Web of Science | peer-reviewed article | empirical/modelling | [3]    | Potential                          | Removing rats may increase seabird nutrients, which may increase resilience of coral reefs to climate change                                                                        |
| Web of Science | peer-reviewed article | review              | [4]    | Potential                          | General mention of eradications increasing resilience to climate change                                                                                                             |
| Web of Science | peer-reviewed article | empirical/modelling | [5]    | Potential                          | Consider sea level rise when planning IAS management                                                                                                                                |
| Web of Science | peer-reviewed article | review              | [6]    | Potential                          | Consider sea level rise when planning IAS management                                                                                                                                |
| Web of Science | peer-reviewed article | review              | [7]    | Potential                          | Consider sea level rise when planning IAS management                                                                                                                                |
| Web of Science | peer-reviewed article | review              | [8]    | Potential                          | Complicated relationships between climate change, erosion, invasive rabbits, and invasive/native plants so need to consider climate change and soil erosion processes in management |
| Web of Science | peer-reviewed article | empirical/modelling | [9]    | Potential                          | Complicated relationships between climate change, erosion, invasive rabbits, and plant cover so need to consider climate change and soil erosion processes in management            |
| Web of Science | peer-reviewed article | empirical/modelling | [10]   | Potential                          | Removing rabbits may allow recovery of vegetation, leading to erosion control, nesting                                                                                              |

| Database                                     | Source type           | Paper type          | Source | Eradication as a climate solution? | Specific link between eradication and climate solution                                   |
|----------------------------------------------|-----------------------|---------------------|--------|------------------------------------|------------------------------------------------------------------------------------------|
|                                              |                       |                     |        |                                    | platforms for native seabirds, and prevent burying of seabird burrows during heavy rains |
| International Conference on Island Invasives | conference paper      | review              | [11]   | Potential                          | General mention of eradications increasing climate resilience and refugia                |
| Web of Science                               | peer-reviewed article | empirical/modelling | [12]   | No                                 |                                                                                          |
| Web of Science                               | peer-reviewed article | empirical/modelling | [13]   | No                                 |                                                                                          |
| Web of Science                               | peer-reviewed article | review              | [14]   | No                                 |                                                                                          |
| Web of Science                               | peer-reviewed article | review              | [15]   | No                                 |                                                                                          |
| Web of Science                               | peer-reviewed article | empirical/modelling | [16]   | No                                 |                                                                                          |
| Web of Science                               | peer-reviewed article | empirical/modelling | [17]   | No                                 |                                                                                          |
| Web of Science                               | peer-reviewed article | empirical/modelling | [18]   | No                                 |                                                                                          |
| Web of Science                               | peer-reviewed article | review              | [19]   | No                                 |                                                                                          |
| Web of Science                               | peer-reviewed article | review              | [20]   | No                                 |                                                                                          |
| Web of Science                               | peer-reviewed article | empirical/modelling | [21]   | No                                 |                                                                                          |
| Web of Science                               | peer-reviewed article | review              | [22]   | No                                 |                                                                                          |
| Web of Science                               | peer-reviewed article | empirical/modelling | [23]   | No                                 |                                                                                          |

| Database                                     | Source type           | Paper type          | Source | Eradication as a climate solution? | Specific link between eradication and climate solution |
|----------------------------------------------|-----------------------|---------------------|--------|------------------------------------|--------------------------------------------------------|
| Web of Science                               | peer-reviewed article | empirical/modelling | [24]   | No                                 |                                                        |
| Web of Science                               | peer-reviewed article | empirical/modelling | [25]   | No                                 |                                                        |
| International Conference on Island Invasives | conference abstract   | review              | [26]   | No                                 |                                                        |
| International Conference on Island Invasives | conference abstract   | review              | [27]   | No                                 |                                                        |
| International Conference on Island Invasives | conference paper      | review              | [28]   | No                                 |                                                        |
| International Conference on Island Invasives | conference paper      | empirical/modelling | [29]   | No                                 |                                                        |
| International Conference on Island Invasives | conference abstract   | empirical/modelling | [30]   | No                                 |                                                        |
| International Conference on Island Invasives | conference abstract   | review              | [31]   | No                                 |                                                        |
| Australasian Vertebrate Pest Conference      | conference abstract   | empirical/modelling | [32]   | No                                 |                                                        |

**Table S3.** Summary list of funded projects that proposed, at least in part, to eradicate an invasive mammal from an island(s) with the justification aimed at improving resilience to the impacts of climate change. Table includes the funding entity: Global Environment Facility (GEF), Darwin Initiative (DI), Green Climate Fund (GCF), and the Wildlife Conservation Society's Climate Adaptation Fund (WCS), name of project, the year of project funding, project country, target species for eradication (including where the target species was not made explicit "TBD"), and name of the project island/archipelago.

| Funding entity | Name of Project                                                                                                                                                                           | Year | Country                       | Target mammal species                                                                                                                       | Island                                                                                                             |
|----------------|-------------------------------------------------------------------------------------------------------------------------------------------------------------------------------------------|------|-------------------------------|---------------------------------------------------------------------------------------------------------------------------------------------|--------------------------------------------------------------------------------------------------------------------|
| GEF            | Strengthening of Governance for the Protection of Biodiversity through the Formulation and Implementation of the National Strategy on Invasive Alien Species (NSIAS)                      | 2012 | Argentina                     | <i>Castor Canadensis</i>                                                                                                                    | Tierra del Fuego Archipelago                                                                                       |
| GEF            | Enhancing National Capacities to Manage Invasive Alien Species (IAS) by Implementing the National Strategy on IAS                                                                         | 2012 | Mexico                        | 1 <i>Peromyscus eremicus cedrosensis</i><br>2 <i>Rattus</i><br>3 <i>Ovis aries; Felis silvestris catus*</i><br>4 <i>F. silvestris catus</i> | 1 San Benito Oeste<br>2 Banco Chinchorro Biosphere Reserve<br>3 Socorro Biosphere Reserve<br>4 Isla Espíritu Santo |
| GEF            | Strengthening and Development of Instruments for the Management, Prevention and Control of Beaver ( <i>Castor Canadensis</i> ), an Invasive Alien Species in the Chilean Patagonia        | 2014 | Chile                         | <i>Castor Canadensis</i>                                                                                                                    | Tierra del Fuego Archipelago                                                                                       |
| GEF            | Building Capacities to Address Invasive Alien Species to Enhance the Chances of Long-term Survival of Terrestrial Endemic and Threatened Species on Taveuni Island and Surrounding Islets | 2015 | Fiji                          | <i>Iguana iguana</i>                                                                                                                        | Taveuni Island and surrounding islets                                                                              |
| GEF            | Strengthening National and Regional Capacities to Reduce the Impact of Invasive Alien Species on Globally Significant Biodiversity in the Pacific                                         | 2017 | 1 French Polynesia<br>2 Tonga | 1 <i>R. exulans</i><br>2 <i>R. exulans; R. rattus</i>                                                                                       | 1 Wallis and Futuna (France)<br>2 Vava'u archipelago                                                               |

| Funding entity | Name of Project                                                                                                                                              | Year Awarded | Country                                             | Target mammal species | Island                                                                                        |
|----------------|--------------------------------------------------------------------------------------------------------------------------------------------------------------|--------------|-----------------------------------------------------|-----------------------|-----------------------------------------------------------------------------------------------|
|                |                                                                                                                                                              |              | 3 Federated States of Micronesia                    | 3 <i>Rattus spp.*</i> | 3 Arno Atoll, Marshall Islands                                                                |
|                |                                                                                                                                                              |              | 4 Tonga, Niue, Republic of Marshall Islands, Tuvalu | 4 <i>Rattus spp.</i>  | 4 Nursey islands to <i>Chelonia mydas</i> and <i>Eretmochelys imbricata</i> throughout region |
| GEF            | Mainstreaming IAS Prevention, Control and Management                                                                                                         | 2017         | Mauritius                                           | TBD                   | TBD                                                                                           |
| GEF            | Capacity strengthening for management of invasive alien species in South Africa to enhance sustainable biodiversity conservation and livelihoods improvement | 2020         | South Africa                                        | <i>Mus musculus</i>   | Marion Island                                                                                 |
| DI             | Strengthening the world's largest Marine Protected Area: Chagos Archipelago                                                                                  | 2012         | Chagos Archipelago, British Indian Ocean Territory  | <i>R. rattus</i>      | Île Vache Marine                                                                              |
| GCF            | Ecosystem-based Adaptation in the Indian Ocean – EBA IO                                                                                                      | 2020         | Madagascar, Mauritius, and Seychelles               | TBD                   | TBD                                                                                           |

\*Project proposed to control invasive species

## References

1. de Wit, L.A.; Zilliacus, K.M.; Quadri, P.; Will, D.; Grima, N.; Spatz, D.; Holmes, N.; Tershy, B.; Howald, G.R.; Croll, D.A. Invasive vertebrate eradications on islands as a tool for implementing global Sustainable Development Goals. *Environ. Conserv.* **2020**, *47*, 139–148. <https://doi.org/10.1017/s0376892920000211>.
2. Cleeland, J.B.; Pardo, D.; Raymond, B.; Terauds, A.; Alderman, R.; McMahon, C.R.; Phillips, R.A.; Lea, M.A.; Hindell, M.A. Introduced species and extreme weather as key drivers of reproductive output in three sympatric albatrosses. *Sci. Rep.* **2020**, *10*, e8199. <https://doi.org/10.1038/s41598-020-64662-5>.
3. Benkwitt, C.E.; Wilson, S.K.; Graham, N.A.J. Seabird nutrient subsidies alter patterns of algal abundance and fish biomass on coral reefs following a bleaching event. *Glob. Chang. Biol.* **2019**, *25*, 2619–2632. <https://doi.org/10.1111/gcb.14643>.
4. Russell, J.C.; Meyer, J.Y.; Holmes, N.D.; Pagad, S. Invasive alien species on islands: impacts, distribution, interactions and management. *Environ. Conserv.* **2017**, *44*, 359–370. <https://doi.org/10.1017/s0376892917000297>.

5. Spatz, D.R.; Holmes, N.D.; Reguero, B.G.; Butchart, S.H.M.; Tershy, B.R.; Croll, D.A. Managing Invasive Mammals to Conserve Globally Threatened Seabirds in a Changing Climate. *Conserv. Lett.* **2017**, *10*, 736–747. <https://doi.org/10.1111/conl.12373>.
6. Russell, J.C.; Cole, N.C.; Zuel, N.; Rocamora, G. Introduced mammals on Western Indian Ocean islands. *Glob. Ecol. Conserv.* **2016**, *6*, 132–144. <https://doi.org/10.1016/j.gecco.2016.02.005>.
7. Croxall, J.P.; Butchart, S.H.M.; Lascelles, B.; Stattersfield, A.J.; Sullivan, B.; Symes, A.; Taylor, P. Seabird conservation status, threats and priority actions: A global assessment. *Bird Conserv. Int.* **2012**, *22*, 1–34. <https://doi.org/10.1017/S0959270912000020>.
8. Chapuis, J.L.; Le Roux, V.; Asseline, J.; Lefevre, L.; Kerleau, F. Eradication of rabbits (*Oryctolagus cuniculus*) by poisoning on three islands of the subantarctic Kerguelen Archipelago. *Wildlife Research* **2001**, *28*, 323–331.
9. Robin, M.; Chapuis, J.L.; Lebouvier, M. Remote sensing of vegetation cover change in islands of the Kerguelen archipelago. *Polar Biol.* **2011**, *34*, 1689–1700. <https://doi.org/10.1007/s00300-011-1069-z>.
10. VanderWerf, E.A.; Wood, K.R.; Swenson, C.; LeGrande, M.; Eijzenga, H.; Walker, R.L. Avifauna of Lehua Islet, Hawai'i: Conservation value and management needs. *Pac. Sci.* **2007**, *61*, 39–52. <https://doi.org/10.1353/psc.2007.0012>.
11. Keitt, B.; Holmes, N.; Hagen, E.; Howald, G.; Poiani, K. Going to scale: reviewing where we've been and where we need to go in invasive vertebrate eradications. In Proceedings of the Island invasives: scaling up to meet the challenge, Dundee, Scotland, March, 2019; pp. 633–636.
12. McKechnie, S.; Fletcher, D.; Newman, J.; Bragg, C.; Dillingham, P.W.; Clucas, R.; Scott, D.; Uhlmann, S.; Lyver, P.; Gormley, A.; et al. Separating the effects of climate, bycatch, predation and harvesting on tt (*Ardenna grisea*) population dynamics in New Zealand: A model-based assessment. *Plos One* **2020**, *15*, e0243794. <https://doi.org/10.1371/journal.pone.0243794>.
13. Parsons, M.A.; Bridges, A.S.; Biteman, D.S.; Garcelon, D.K. Precipitation and prey abundance influence food habits of an invasive carnivore. *Anim. Conserv.* **2020**, *23*, 60–71. <https://doi.org/10.1111/acv.12510>.
14. Pyšek, P.; Hulme, P.E.; Simberloff, D.; Bacher, S.; Blackburn, T.M.; Carlton, J.T.; Dawson, W.; Essl, F.; Foxcroft, L.C.; Genovesi, P.; et al. Scientists' warning on invasive alien species. *Biol. Rev.* **2020**, *95*, 1511–1534. <https://doi.org/10.1111/brev.12627>.
15. Rodriguez, A.; Arcos, J.M.; Bretagnolle, V.; Dias, M.P.; Holmes, N.D.; Louzao, M.; Provencher, J.; Raine, A.F.; Ramirez, F.; Rodriguez, B.; et al. Future Directions in Conservation Research on Petrels and Shearwaters. *Front. Mar. Sci.* **2019**, *6*, 94. <https://doi.org/10.3389/fmars.2019.00094>.
16. McClelland, G.T.W.; Altwegg, R.; van Aarde, R.J.; Ferreira, S.; Burger, A.E.; Chown, S.L. Climate change leads to increasing population density and impacts of a key island invader. *Ecol. Appl.* **2018**, *28*, 212–224. <https://doi.org/10.1002/eap.1642>.
17. Knowlton, J.L.; Flaspohler, D.J.; Paxton, E.H.; Fukami, T.; Giardina, C.P.; Gruner, D.S.; Rankin, E.E.W. Movements of four native Hawaiian birds across a naturally fragmented landscape. *J. Avian Biol.* **2017**, *48*, 921–931. <https://doi.org/10.1111/jav.00924>.
18. Renaud, S.; Hardouin, E.A.; Pisanu, B.; Chapuis, J.L. Invasive house mice facing a changing environment on the Sub-Antarctic Guillou Island (Kerguelen Archipelago). *J. Evol. Biol.* **2013**, *26*, 612–624. doi:doi:<https://doi.org/10.1111/jeb.12079>.
19. Reed, J.M.; DesRochers, D.W.; VanderWerf, E.A.; Scott, J.M. Long-Term Persistence of Hawaii's Endangered Avifauna through Conservation-Reliant Management. *Biosci.* **2012**, *62*, 881–892. <https://doi.org/10.1525/bio.2012.62.10.8>.
20. Towns, D.R.; Bellingham, P.J.; Mulder, C.P.H.; Lyver, P.O.B. A research strategy for biodiversity conservation on New Zealand's offshore islands. *New Zealand J. Ecol.* **2012**, *36*, 1–20. <https://www.jstor.org/stable/24060870>
21. McEachern, A.K.; Thomson, D.M.; Chess, K.A. Climate alters response of an endemic island plant to removal of invasive herbivores. *Ecol. Appl.* **2009**, *19*, 1574–1584. <https://doi.org/10.1890/08-1574.1>.
22. Gerlach, J. Preliminary conservation status and needs of an oceanic island fauna: the case of Seychelles insects. *J. Insect Conserv.* **2008**, *12*, 293–305. <https://doi.org/10.1007/s10841-008-9156-3>.
23. Harris, D.B.; Macdonald, D.W. Interference competition between introduced black rats and endemic Galapagos rice rats. *Ecology* **2007**, *88*, 2330–2344. <https://doi.org/10.1890/06-1701.1>.

24. Chapuis, J.L.; Frenot, Y.; Lebouvier, M. Recovery of native plant communities after eradication of rabbits from the subantarctic Kerguelen Islands, and influence of climate change. *Biol. Conserv.* **2004**, *117*, 167–179. [https://doi.org/10.1016/s0006-3207\(03\)00290-8](https://doi.org/10.1016/s0006-3207(03)00290-8).
25. Huyser, O.; Ryan, P.G.; Cooper, J. Changes in population size, habitat use and breeding biology of lesser sheathbills (*Chionis minor*) at Marion Island: Impacts of cats, mice and climate change? *Biol. Conserv.* **2000**, *92*, 299–310. [https://doi.org/10.1016/S0006-3207\(99\)00096-8](https://doi.org/10.1016/S0006-3207(99)00096-8).
26. Aguirre-Muñoz, A.; Méndez-Sánchez, F.; Luna-Mendoza, L.; Ortiz-Alcaraz, A.; Hernández-Montoya, J.; Bedolla-Guzmán, Y.; Latofski-Robles, M.; Rojas-Mayoral, E.; Silva-Estudillo, N.; Torres-García, F.; et al. Mexico's progress and commitment to comprehensive island restoration. In Proceedings of the Island invasives: scaling up to meet the challenge, Dundee, Scotland, March, 2019; p. 704.
27. Andreozzi, P.C.; Griffiths, R.; Moverley, D.; Wainiqolo, J.; Nias, R.; Boudjelas, S.; Stewart, D.; Cranwell, S.; M., S.; P, C. The Pacific Invasives Partnership – A Model for Regional Collaboration on Invasive Alien Species. In Proceedings of the Island invasives: scaling up to meet the challenge, Dundee, Scotland, March, 2019; p. 704.
28. Key, G.; Moore, N. Tackling invasive non-native species in the UK Overseas Territories. In Proceedings of the Island invasives: scaling up to meet the challenge, Dundee, Scotland, March, 2019; pp. 637–642.
29. Preston, G.; Dilley, B.; Cooper, J.; Beaumont, J.; Chauke, F.; Chown, S.L.; Devanunthan, N.; Dopollo, M.T.; Fikizolo, L.; Heine, J. South Africa works towards eradicating introduced house mice from sub-Antarctic Marion Island: the largest island yet attempted for mice. In Proceedings of the Island invasives: scaling up to meet the challenge, Dundee, Scotland, March, 2019; pp. 40–46.
30. Thibault, J.C.; Brescia, F.; Barbet-Massin, M. Predicting the distribution of island invader bird species under climate change. In Proceedings of the Island invasives: scaling up to meet the challenge, Dundee, Scotland, March, March, 2019; p. 724.
31. Veatch, S.D. Prioritising Islands for the Eradication of Invasive Vertebrates in the Arctic. In Proceedings of the Island Invasives: Scaling Up to Meet the Challenge, Dundee, Scotland, March, 2019; p. 726.
32. Pech, R.; Barron, M.; Tait, A.; Byrom, A.; Holland, E.; James, A.; Tompkins, D. Will Climate Change Alter the Dynamics and Control of Outbreaking Species? In Proceedings of the 16th Australasian Vertebrate Pest Conference, Brisbane, Australia, May, 2014; p. 66.
